# Supplementary material for: There Is More Than Meets the Eye: Identification of Dual Molecular Diagnosis in Patients Affected by Hearing Loss
Source: MDPI journal article supplement (doi:10.3390/biomedicines10010012), 2021-12-22
Supplement: s1 [file s1]

## Fam 1

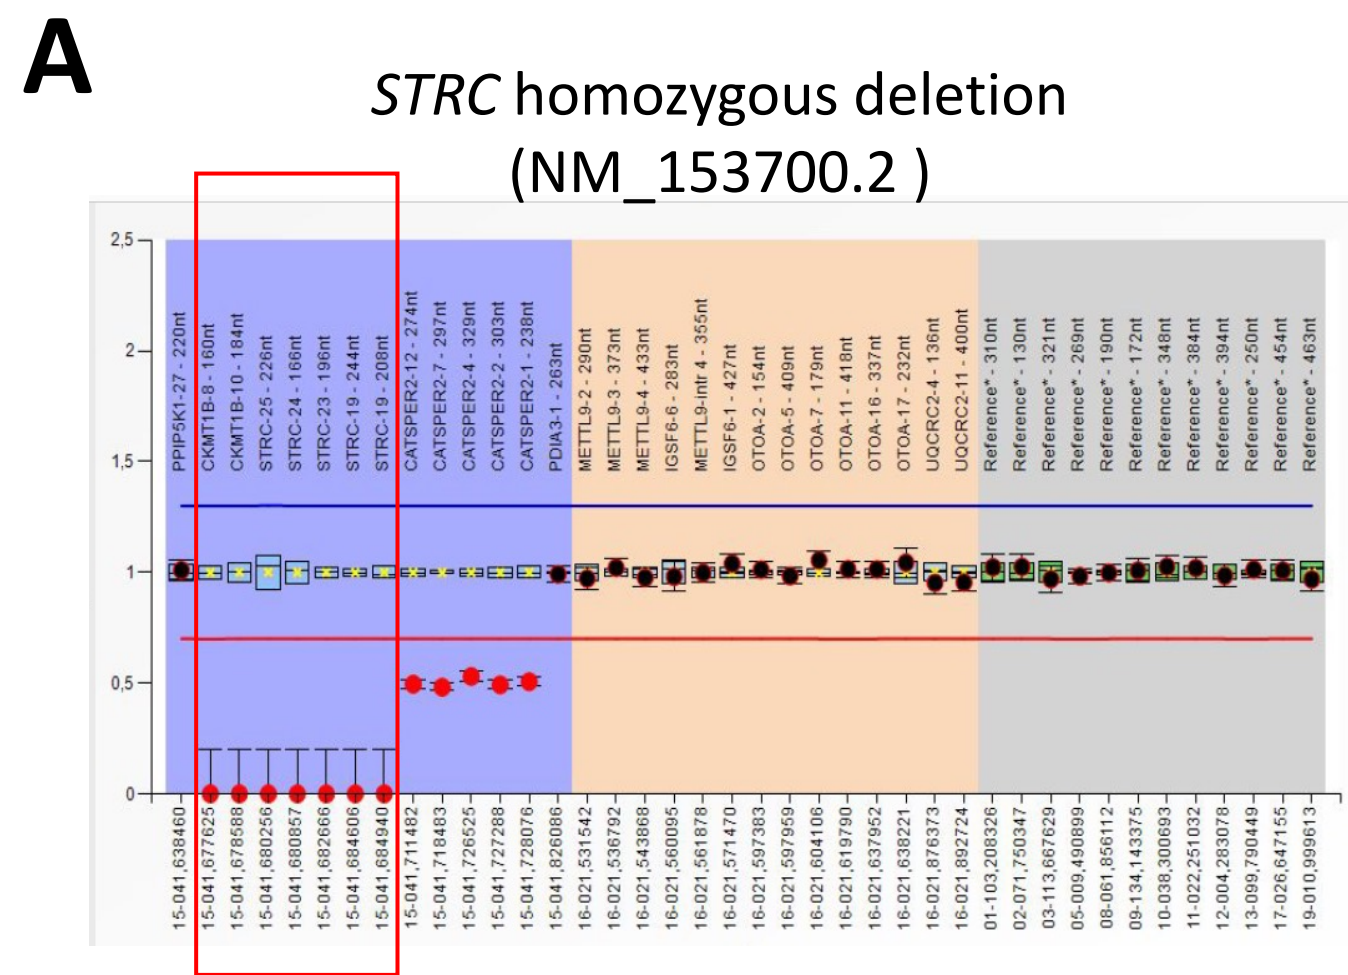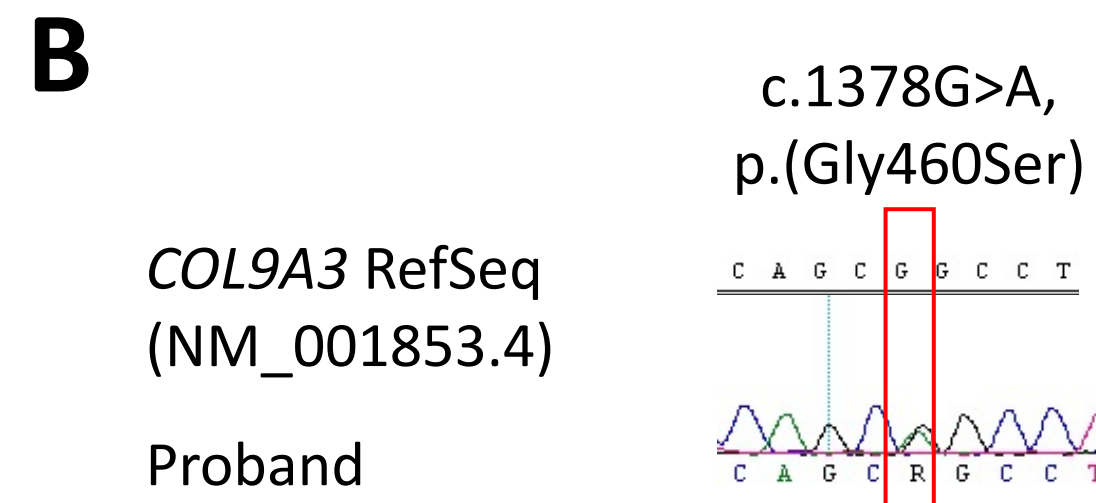

p.Gly460

| Species         | Sequence                                                    | Position |
|-----------------|-------------------------------------------------------------|----------|
| Sus scrofa      | GPGQLRGGMDRGPFGATGPKGDGGIAGSDGLPGDKGELGSPGVGPKGEAGSRGELGPK  | 433      |
| Macaca mulatta  | GPGQFRGVDGRGPGGATGPKGDGGIAGSDGLPGDKGELGSPGVGPKGESGSRGELGPK  | 477      |
| Pan troglodytes | GPGQLRGGMDRGPFGAAGPKGDGGIAGSDGLPGDKGELGSPGLVGPKGESGSRGELGPK | 470      |
| Homo sapiens    | GPGQLRGGMDRGPFGAAGPKGDGGIAGSDGLPGDKGELGSPGLVGPKGESGSRGELGPK | 477      |
| Pongo abelii    | GPGQLRGGMDRGPFGAAGPKGDGGIAGSDGLPGDKGELGSPGLVGPKGESGSRGELGPK | 479      |

## Fam 2

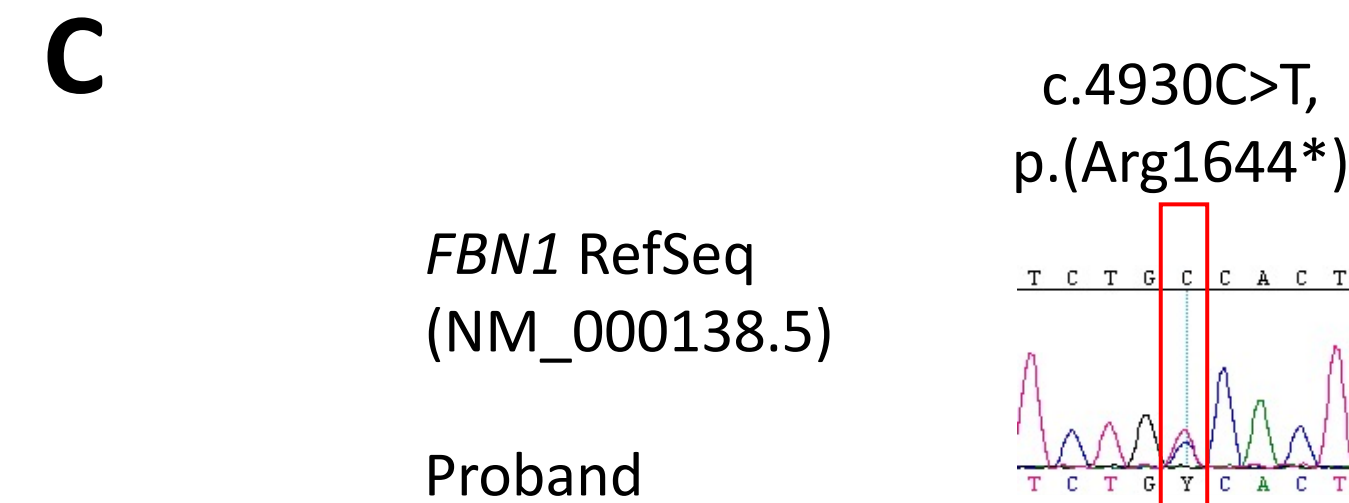

p.Arg1644

| Species         | Sequence                                                   | Position |
|-----------------|------------------------------------------------------------|----------|
| Sus scrofa      | KCINTFGSFQCRPTGYLLNEDTRVCDVNECEPFGICGPGTCYNTVGNVTCICPPDYMQ | 1680     |
| Macaca mulatta  | KCINTFGSFQCRPTGYLLNEDTRVCDVNECEPFGICGPGTCYNTVGNVTCICPPDYMQ | 1680     |
| Pongo abelii    | KCINTFGSFQCRPTGYLLNEDTRVCDVNECEPFGICGPGTCYNTVGNVTCICPPDYMQ | 1680     |
| Homo sapiens    | KCINTFGSFQCRPTGYLLNEDTRVCDVNECEPFGICGPGTCYNTVGNVTCICPPDYMQ | 1680     |
| Pan troglodytes | KCINTFGSFQCRPTGYLLNEDTRVCDVNECEPFGICGPGTCYNTVGNVTCICPPDYMQ | 1680     |

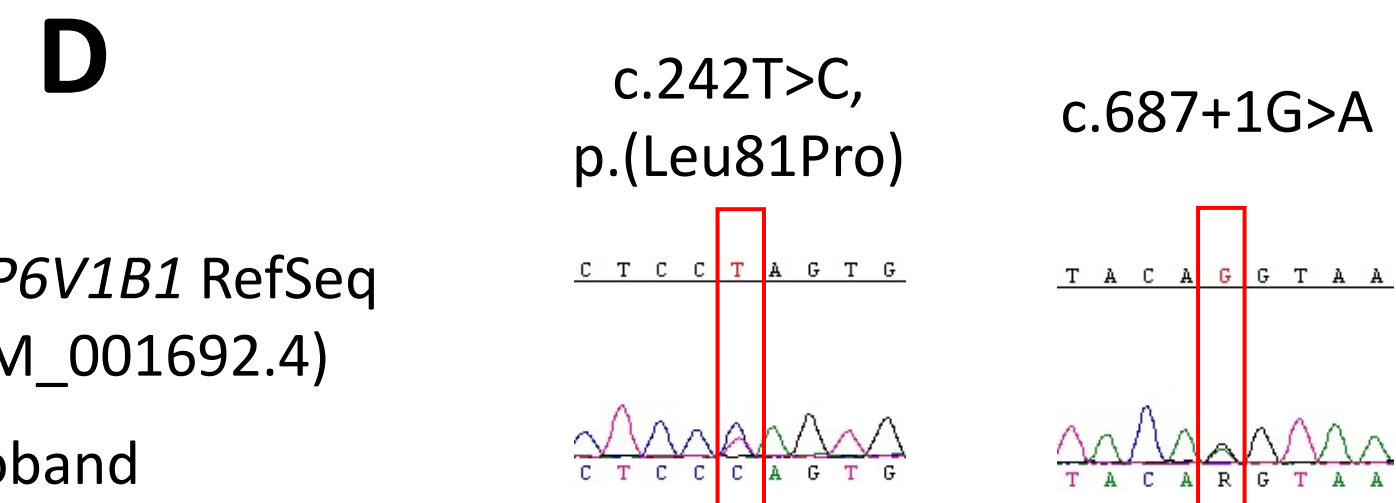

p.Leu81

| Species         | Sequence                                                   | Position |
|-----------------|------------------------------------------------------------|----------|
| Equus Caballus  | QYAEIVNFTLFPNGTQRSGQVLEVAGTKAIVQVFEGTSGIDAQKTCFTGDLRTPVSED | 120      |
| Pongo abelii    | QYAEIVHFTLDPGTQRSGQVLEVAGTKAIVQVFEGTSGIDARKTTCFTGDLRTPVSED | 116      |
| Homo sapiens    | QYAEIVHFTLDPGTQRSGQVLEVAGTKAIVQVFEGTSGIDARKTTCFTGDLRTPVSED | 120      |
| Pan troglodytes | QYAEIVHFTLDPGTQRSGQVLEVAGTKAIVQVFEGTSGIDARKTTCFTGDLRTPVSED | 120      |
| Macaca mulatta  | QYAEIVHFTLDPGTQRSGQVLEVAGTKAIVQVFEGTSGIDARKTTCFTGDLRTPVSED | 120      |

## Fam 3

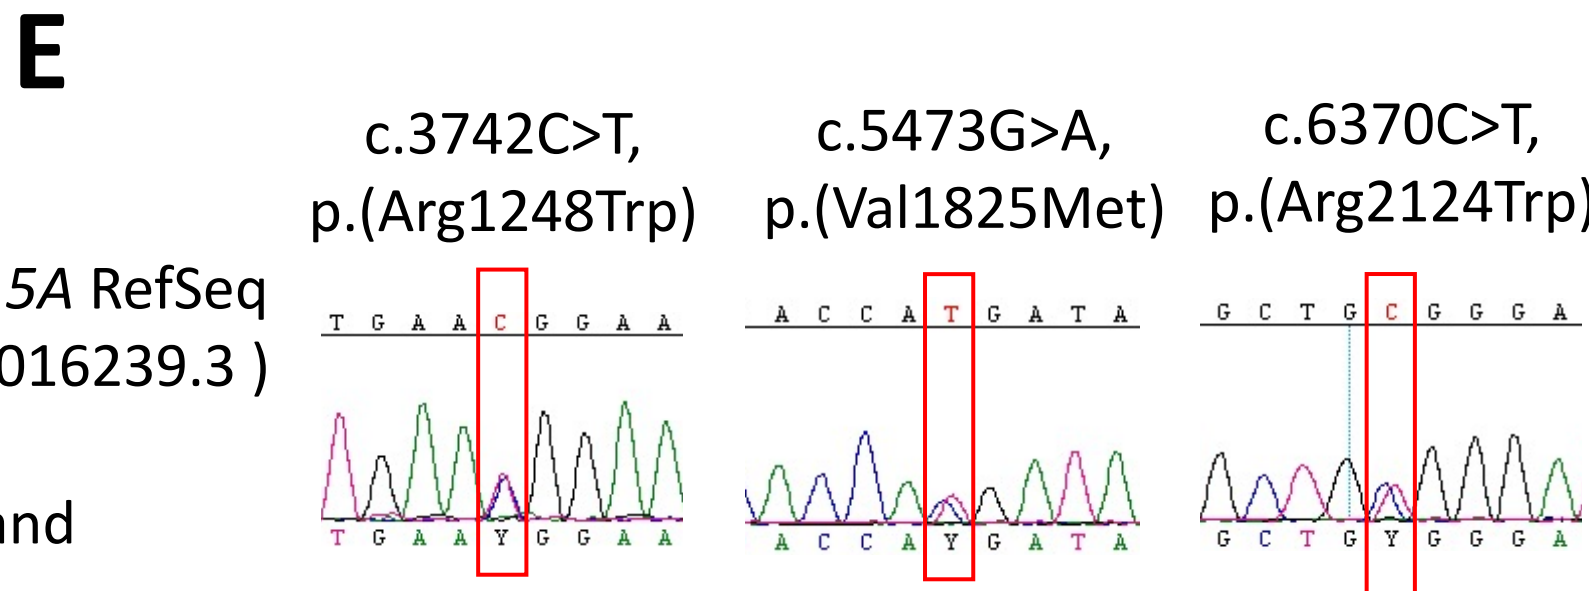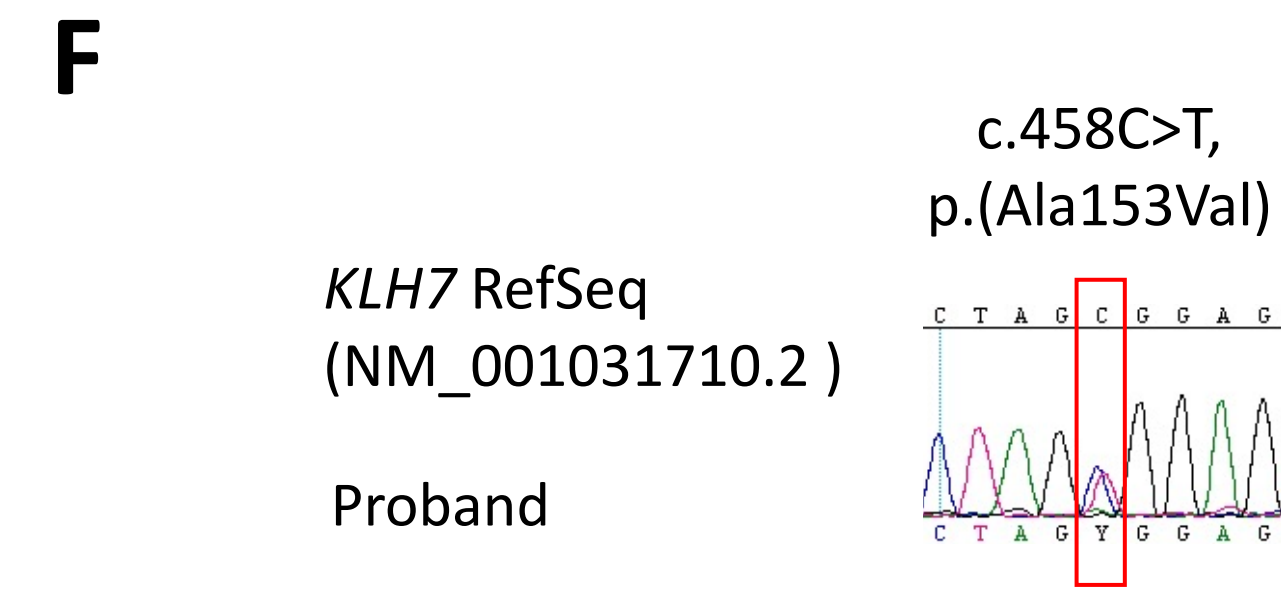

p.Arg1248

| Species        | Sequence                                                 | Position |
|----------------|----------------------------------------------------------|----------|
| Equus caballus | TRFERNLIYTYIGSILVSVNPMFGIYGPBQVQYNGRALGENPPLFAIANLAFAKMI | 1288     |
| Macaca mulatta | IRFERNLIYTYIGSILVSVNPMFGIYGPBQVQYNGRALGENPPLFAIANLAFAKMI | 1301     |
| Pongo abelii   | MRFERNLIYTYIGSILVSVNPMFGIYGPBQVQYNGRALGENPPLFAIANLAFAKMI | 1296     |
| Homo sapiens   | IRFERNLIYTYIGSILVSVNPMFGIYGPBQVQYNGRALGENPPLFAIANLAFAKMI | 1303     |
| Pan paniscus   | IRFERNLIYTYIGSILVSVNPMFGIYGPBQVQYNGRALGENPPLFAIANLAFAKMI | 1303     |

p.Val1825

| Species        | Sequence                                                      | Position |
|----------------|---------------------------------------------------------------|----------|
| Equus caballus | KMERCNPLFVRCLKPNHKKPEGLFEPDVVMAQLRYSGLVETVIRIRKEGFPVRLPFQGPID | 1828     |
| Macaca mulatta | KMERCNPLFMRCLKPNHKKPEGLFEPDVVMAQLRYSGLVETVIRIRKEGFPVRLPFQGPID | 1841     |
| Pongo abelii   | KMERCNPLFMRCLKPNHKKPEGLFEPDVVMAQLRYSGLVETVIRIRKEGFPVRLPFQGPID | 1836     |
| Homo sapiens   | KMERCNPLFMRCLKPNHKKPEGLFEPDVVMAQLRYSGLVETVIRIRKEGFPVRLPFQGPID | 1843     |
| Pan paniscus   | KMERCNPLFMRCLKPNHKKPEGLFEPDVVMAQLRYSGLVETVIRIRKEGFPVRLPFQGPID | 1843     |

p.Arg2124

| Species        | Sequence                                                      | Position |
|----------------|---------------------------------------------------------------|----------|
| Equus caballus | EAVGVFKILIRFMGDPHLHGAQENIFGNVIVQKGLAVPEIRDEILAQLANQVWHNPSAHN  | 2128     |
| Macaca mulatta | EAVSVFKILIRFMGDPHLHGAQENIFGNVIVQKGLAVPEIRDEILAQLANQVWHNHNHNAH | 2123     |
| Pongo abelii   | EAVSIFKILIRFMGDPHLHGAQENIFGNVIVQKGLAVPEIRDEILAQLANQVWHNHNHNAH | 2136     |
| Homo sapiens   | EAVSIFKILIRFMGDPHLHGAQENIFGNVIVQKGLAVPEIRDEILAQLANQVWHNHNHNAH | 2143     |
| Pan paniscus   | EAVSIFKILIRFMGDPHLHGAQENIFGNVIVQKGLAVPEIRDEILAQLANQVWHNHNHNAH | 2143     |

p.Ala153

| Species        | Sequence                                                      | Position |
|----------------|---------------------------------------------------------------|----------|
| Gallus gallus  | ANQYQIEPVKMKCVDFLKEQVDASNCLGISVIAECILDCEPLKATADDFIHQHFTEVYKTD | 180      |
| Equus caballus | ANQYQIEPVKMKCVDFLKEQVDASNCLGISVIAECILDCEPLKATADDFIHQHFTEVYKTD | 180      |
| Bos taurus     | ANQYQIEPVKMKCVDFLKEQVDASNCLGISVIAECILDCEPLKATADDFIHQHFTEVYKTD | 180      |
| Homo sapiens   | ANQYQIEPVKMKCVDFLKEQVDASNCLGISVIAECILDCEPLKATADDFIHQHFTEVYKTD | 180      |
| Macaca mulatta | ANQYQIEPVKMKCVDFLKEQVDASNCLGISVIAECILDCEPLKATADDFIHQHFTEVYKTD | 180      |

## Fam 4

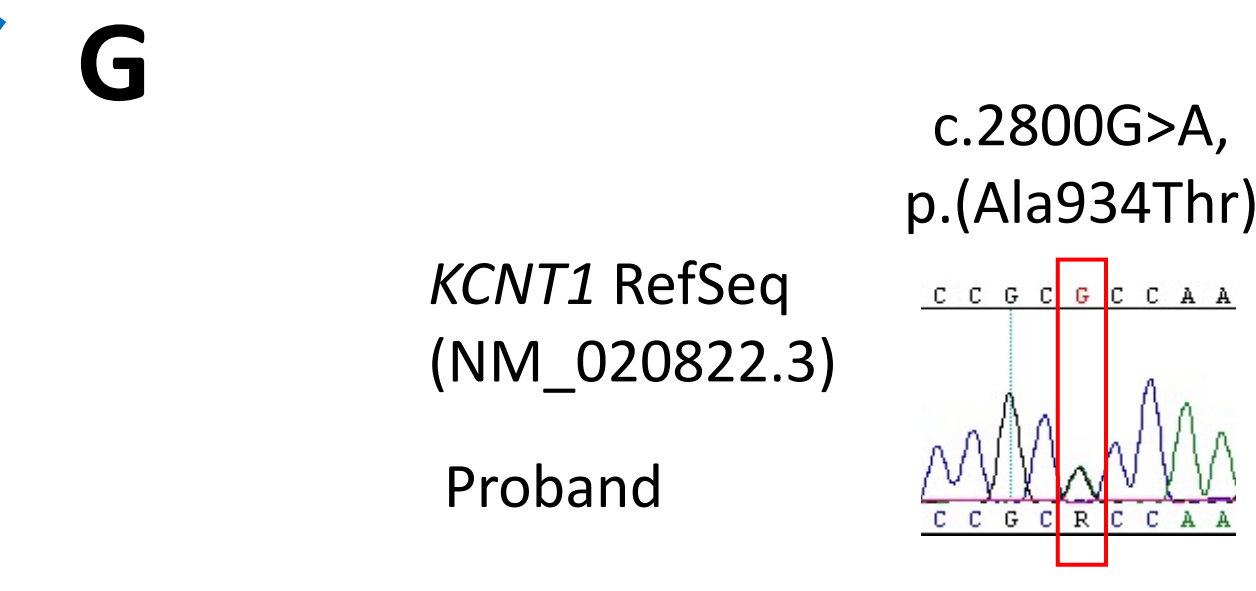

p.Ala934

| Species         | Sequence                                                    | Position |
|-----------------|-------------------------------------------------------------|----------|
| Sus scrofa      | MADAKTIVNVQTMFLFPLSITITELTHPSNMRMFQFPAKDSYSLALSLEKREERENGSN | 960      |
| Macaca mulatta  | MADAKTIVNVQTMFLFPLSITITELTHPSNMRMFQFPAKDSYSLALSLEKREERENGSN | 955      |
| Pongo abelii    | MADAKTIVNVQTMFLFPLSITITELTHPSNMRMFQFPAKDSYSLALSLEKREERENGSN | 955      |
| Homo sapiens    | MADAKTIVNVQTMFLFPLSITITELTHPSNMRMFQFPAKDSYSLALSLEKREERENGSN | 955      |
| Pan troglodytes | MADAKTIVNVQTMFLFPLSITITELTHPSNMRMFQFPAKDSYSLALSLEKREERENGSN | 955      |

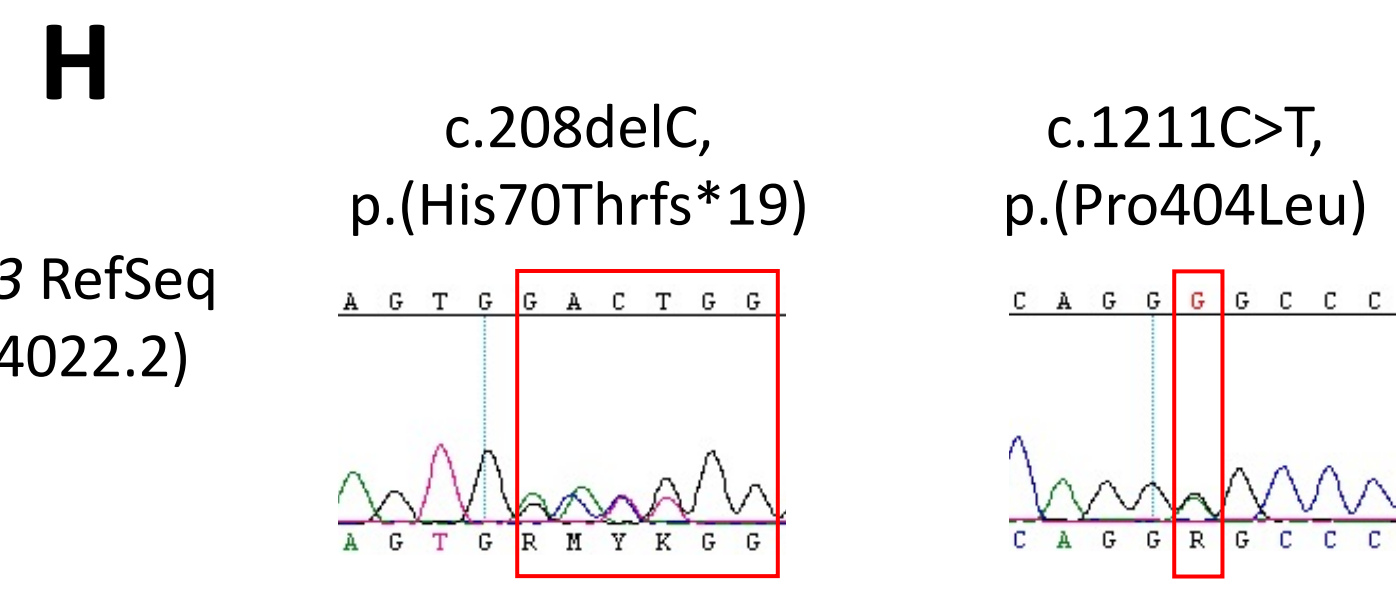

p.His70

| Species         | Sequence                                                   | Position |
|-----------------|------------------------------------------------------------|----------|
| Equus Caballus  | AAQILSLPLKFFPIIVIGIIIALILALAIGLHFDGSGKYRCRSSFKCIELTARCDGVS | 96       |
| Macaca mulatta  | AAQILSLPLKFFPIIVIGIIIALILALAIGLHFDGSGKYRCRSSFKCIELTARCDGVS | 180      |
| Pongo abelii    | AAQILSLPLKFFPIIVIGIIIALILALAIGLHFDGSGKYRCRSSFKCIELTARCDGVS | 96       |
| Homo sapiens    | AAQILSLPLKFFPIIVIGIIIALILALAIGLHFDGSGKYRCRSSFKCIELTARCDGVS | 96       |
| Pan troglodytes | AAQILSLPLKFFPIIVIGIIIALILALAIGLHFDGSGKYRCRSSFKCIELTARCDGVS | 96       |

p.Pro404

| Species         | Sequence                                                     | Position |
|-----------------|--------------------------------------------------------------|----------|
| Equus Caballus  | CQGDGSGPLVQCERRLWKLVGATSFIGICAEVKNKPGVYTRVTSFLDWIHEQMERRDLKT | 453      |
| Macaca mulatta  | CQGDGSGPLVQCERRLWKLVGATSFIGICAEVKNKPGVYTRVTSFLDWIHEQMERRDLKT | 537      |
| Pongo abelii    | CQGDGSGPLVQCERRLWKLVGATSFIGICAEVKNKPGVYTRVTSFLDWIHEQMERRDLKT | 454      |
| Homo sapiens    | CQGDGSGPLVQCERRLWKLVGATSFIGICAEVKNKPGVYTRVTSFLDWIHEQMERRDLKT | 454      |
| Pan troglodytes | CQGDGSGPLVQCERRLWKLVGATSFIGICAEVKNKPGVYTRVTSFLDWIHEQMERRDLKT | 454      |

## Fam 6

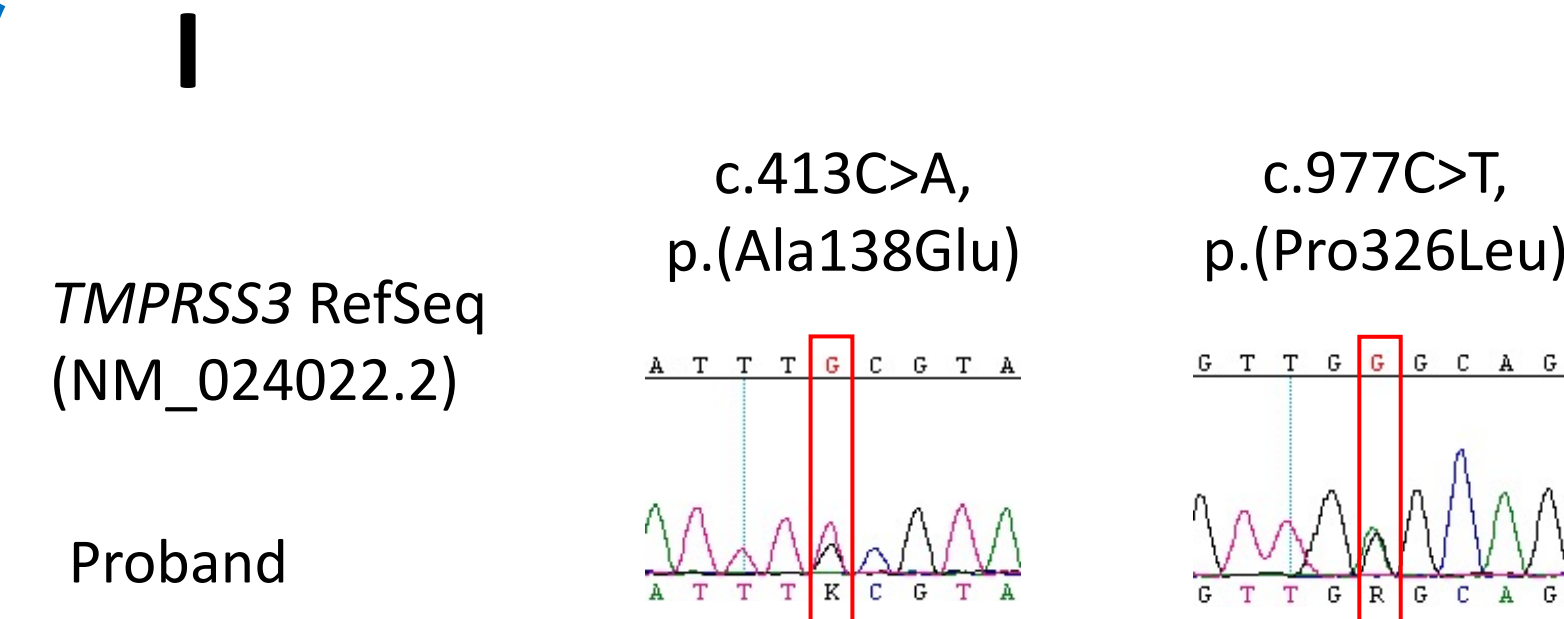

p.Ala138

| Species         | Sequence                                                      | Position |
|-----------------|---------------------------------------------------------------|----------|
| Equus Caballus  | TAAAWRTVCSDDWKAHHAIVACAQLGFPSYVSSDNLRVSSLEGGFREFEVSINHLPLPDK  | 180      |
| Macaca mulatta  | TAAASWRTVCSDDWKGHHAIVACAQLGFPSYVSSDNLRVSSLEGGFREFEVSINHLPLPDK | 180      |
| Pongo abelii    | TAAASWRTVCSDDWKGHHAIVACAQLGFPSYVSSDNLRVSSLEGGFREFEVSINHLPLPDK | 180      |
| Homo sapiens    | TAAASWRTVCSDDWKGHHAIVACAQLGFPSYVSSDNLRVSSLEGGFREFEVSINHLPLPDK | 180      |
| Pan troglodytes | TAAASWRTVCSDDWKGHHAIVACAQLGFPSYVSSDNLRVSSLEGGFREFEVSINHLPLPDK | 180      |

p.Pro326

| Species         | Sequence                                                     | Position |
|-----------------|--------------------------------------------------------------|----------|
| Equus Caballus  | LGNDIALMKLAGPLAFNEMIQPVCLPNSEESFPDGRKMCWTSWGATEDG-GDASPVLNHA | 359      |
| Macaca mulatta  | LGNDIALMKLAGPLAFNEMIQPVCLPNSEESFPDGRKMCWTSWGATEDG-GDASPVLNHA | 359      |
| Pongo abelii    | LGNDIALMKLAGPLAFNEMIQPVCLPNSEESFPDGRKMCWTSWGATEDG-GDASPVLNHA | 360      |
| Homo sapiens    | LGNDIALMKLAGPLAFNEMIQPVCLPNSEESFPDGRKMCWTSWGATEDG-GDASPVLNHA | 360      |
| Pan troglodytes | LGNDIALMKLAGPLAFNEMIQPVCLPNSEESFPDGRKMCWTSWGATEDG-GDASPVLNHA | 360      |

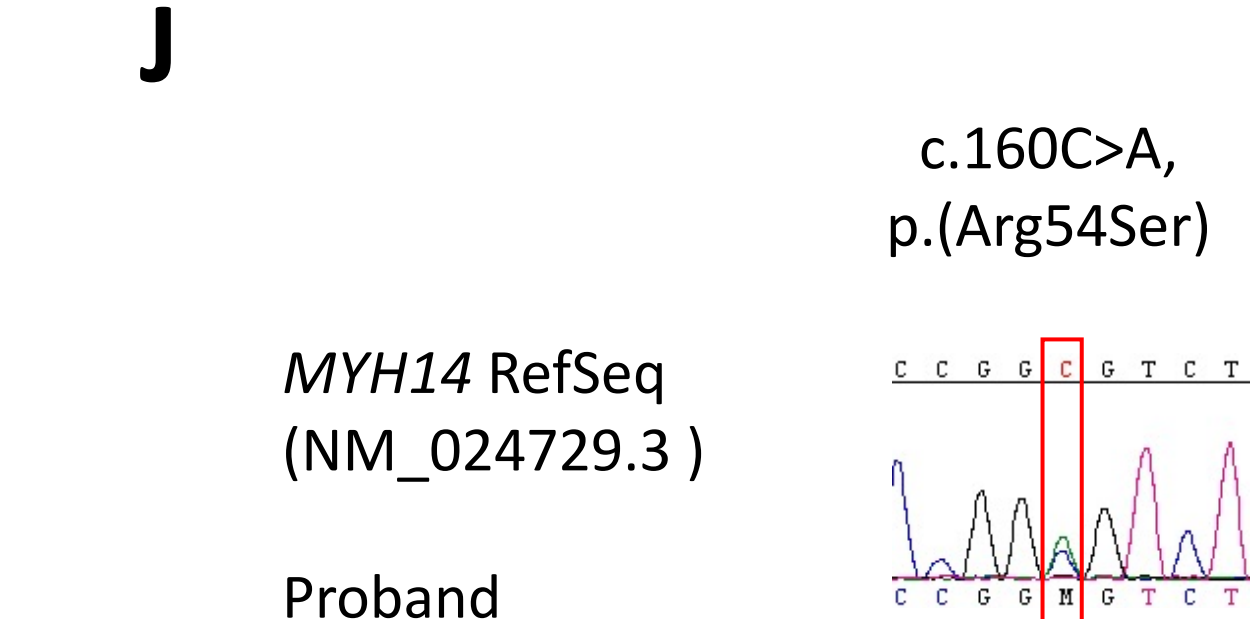

p.Arg54

| Species         | Sequence                                                    | Position |
|-----------------|-------------------------------------------------------------|----------|
| Equus Caballus  | MAAVTSVAGRKAAPPQPGVPEAAQPYLFAPRASSVG-----GPGAAPQVETAHRLVWVP | 56       |
| Felis catus     | MAAVTSLVGRKAAPPQPGVPEAAQPYLFAPRASSVG-----GPGAAPQVETAHRLVWVP | 60       |
| Pongo abelii    | MAAVTMSVGRKAAPPQPGVPEAAQPYLFAPRASSVG-----GPGAAPQVETAHRLVWVP | 59       |
| Homo sapiens    | MAAVTMSVGRKAAPPQPGVPEAAQPYLFAPRASSVG-----GPGAAPQVETAHRLVWVP | 59       |
| Pan troglodytes | MAAVTMSVGRKAAPPQPGVPEAAQPYLFAPRASSVG-----GPGAAPQVETAHRLVWVP | 59       |
